# Supplementary material for: New insight into the SSC8 genetic determination of fatty acid composition in pigs
Source: PubMed Central journal article supplement (PMC4043687; doi:10.1186/1297-9686-46-28), 2014-04-23

**C16:1(n-7)**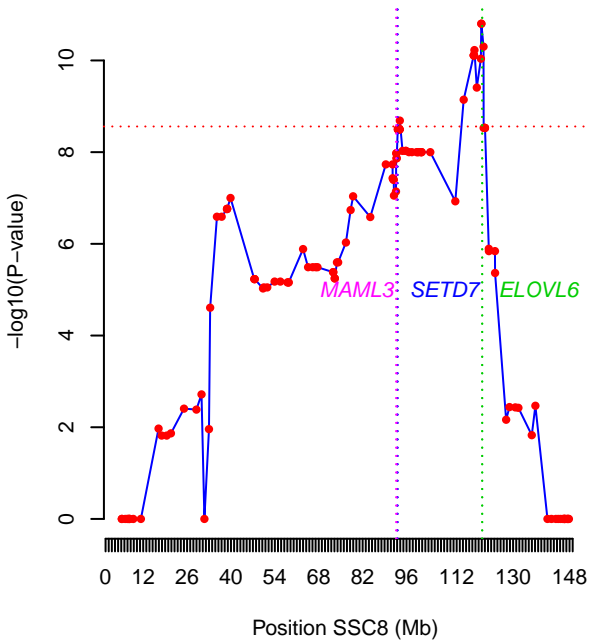**ACL**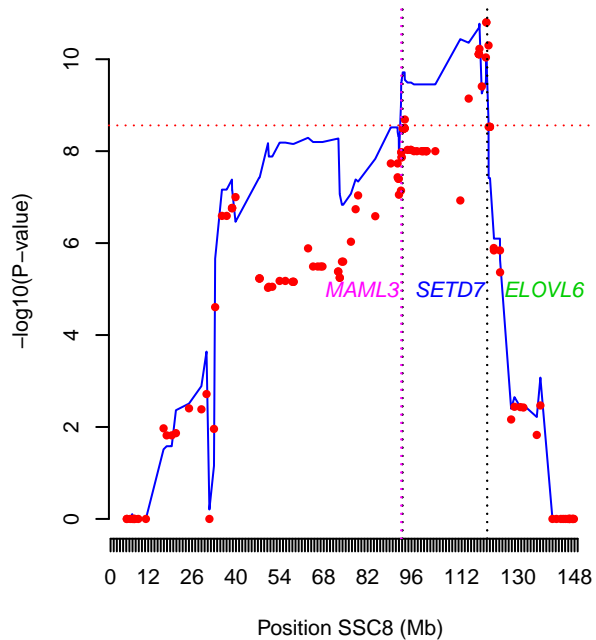**C18:1(n-7)/C16:1(n-7)**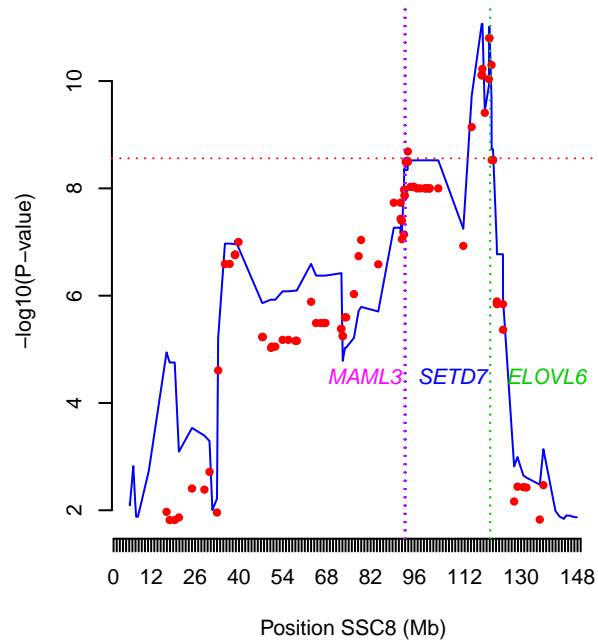

Supplement: 1297-9686-46-28-S3.pdf [file 1297-9686-46-28-S3.pdf]
